# Supplementary material for: The Effects of Repeated Fecal Transplantation and Activated Charcoal Treatment on Gut Dysbiosis Induced by Concurrent Ceftriaxone Administration in Mice
Source: Research Square preprint supplement (doi:10.21203/rs.3.rs-5350460/v1), 2025-03-25
Supplement: Supplementary file 1 [file 0cc9f00d7c7cfe14b1186907.docx]

**Supplementary Figure**

**
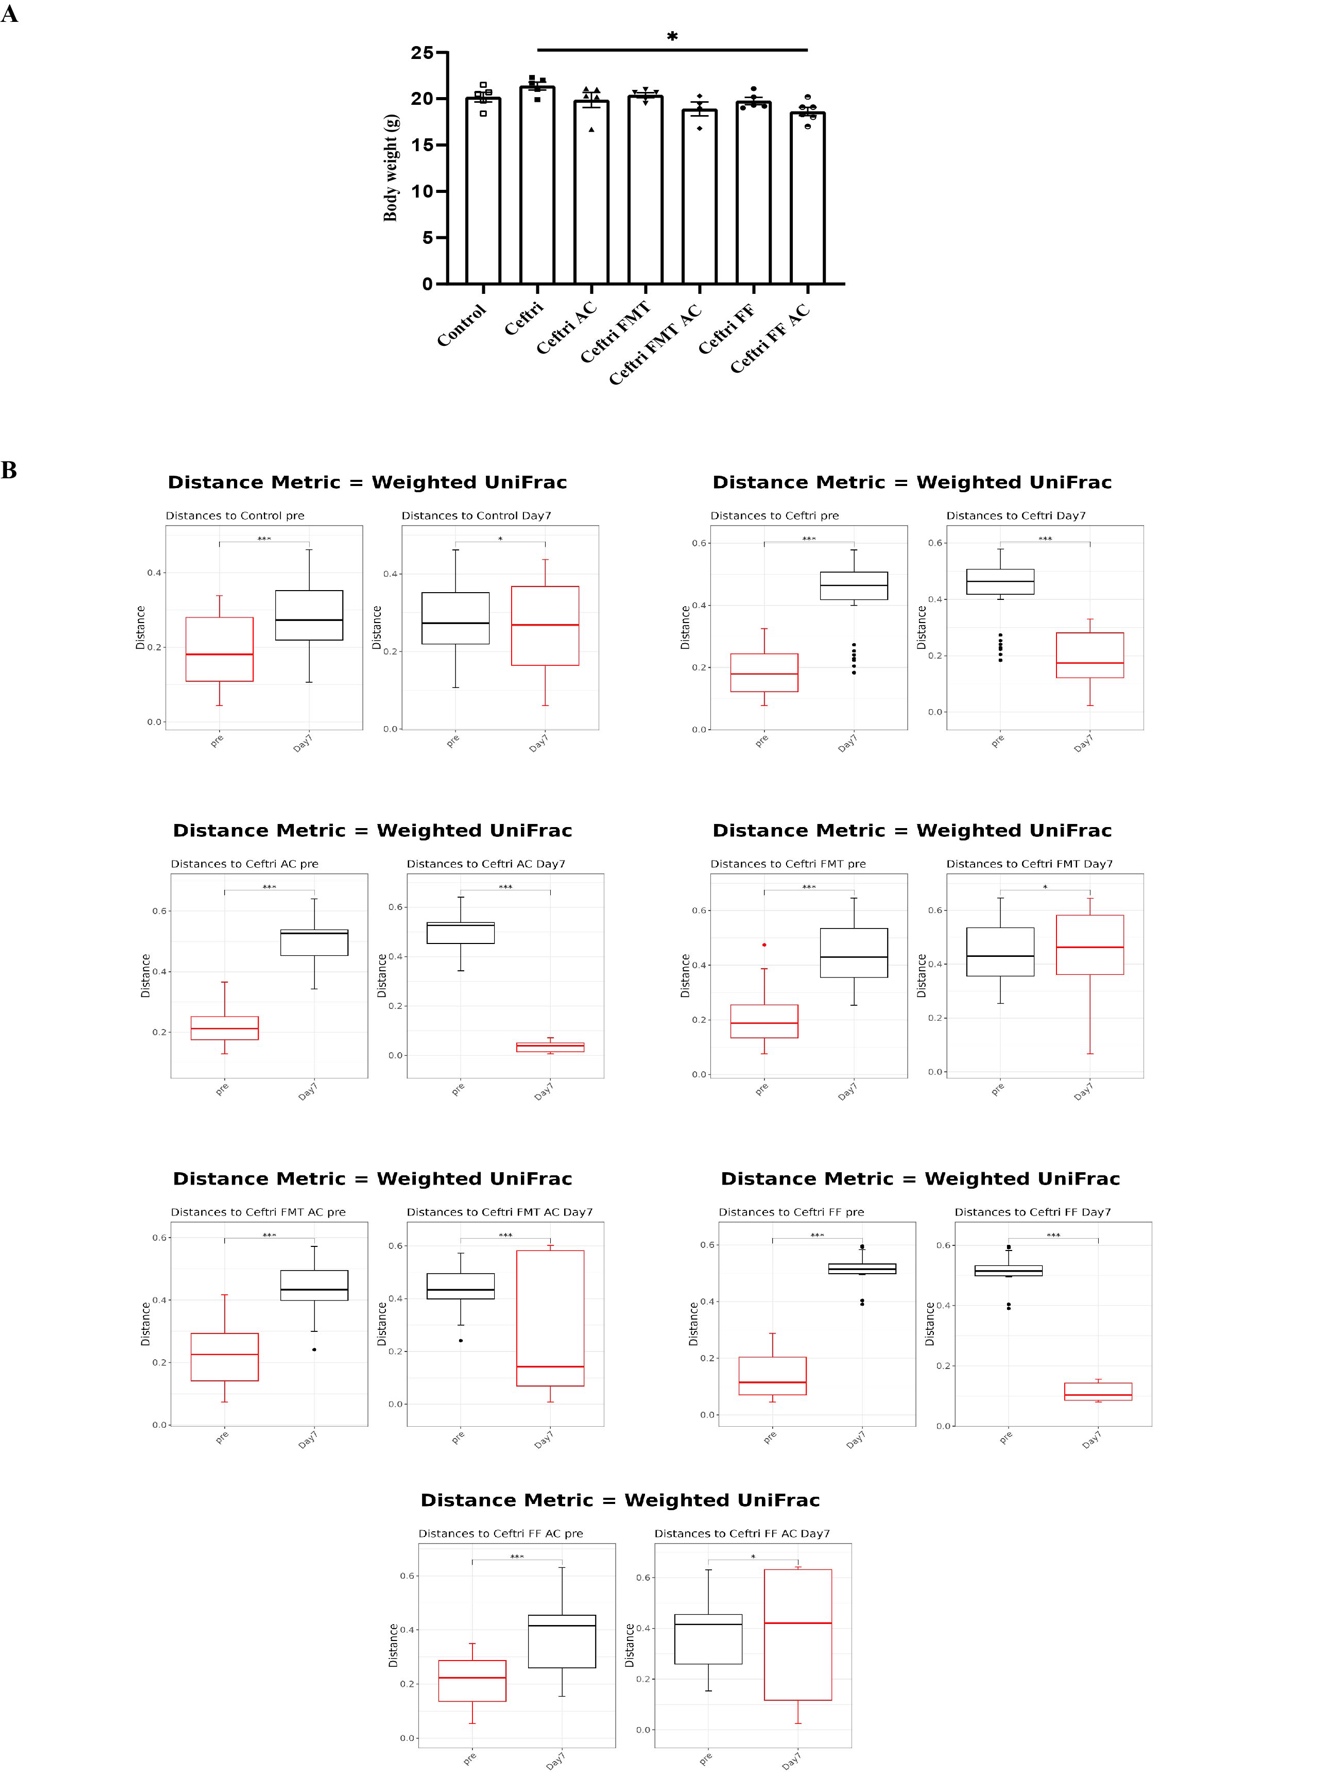
**

**Supplementary Figure 1. The body weight changes and distance metric pairwise in the dysbiosis mouse model.**

**A** Mean body weight on day 7 (n = 4-6 per group). **B** Distance metric pairwise on weighted UniFrac using the Bray Curtis method of sequenced 16S rRNA gene in the feces from different experimental treatment groups at day 7 (n = 4-6 per group). All experimental data are representative of two independent experiments. Statistics were done using one-way ANOVA Welch's test (A), and the Kruskal-Wallis test (B). **p* < 0.05, ***p* < 0.01, ****p*< 0.001.
